# Supplementary material
Source: Springer Nature journal article supplement (https://www.springermedizin.de/resource/supplementary/12935_2013_408_MOESM1_ESM.pdf/9540436)

Effect of PEITC on breast cancer cell lines

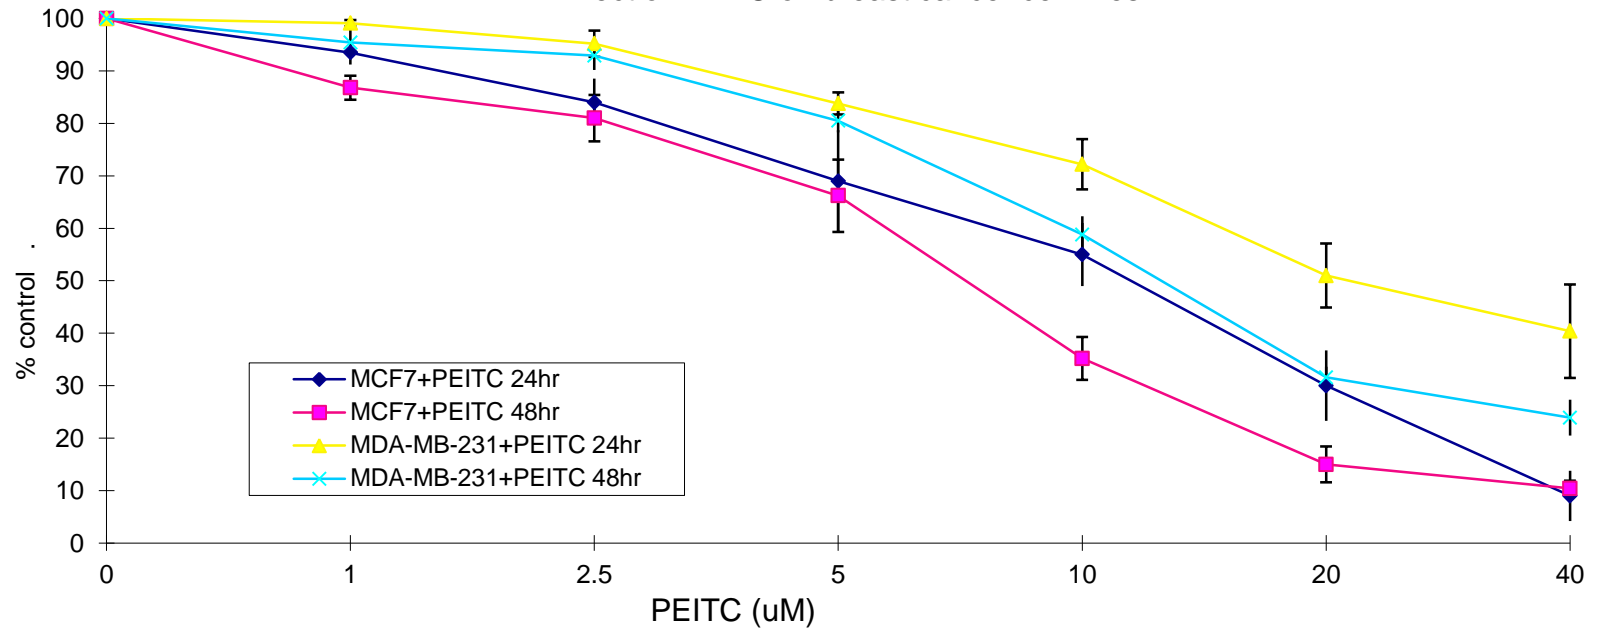

Effect of taxol on breast cancer cell lines

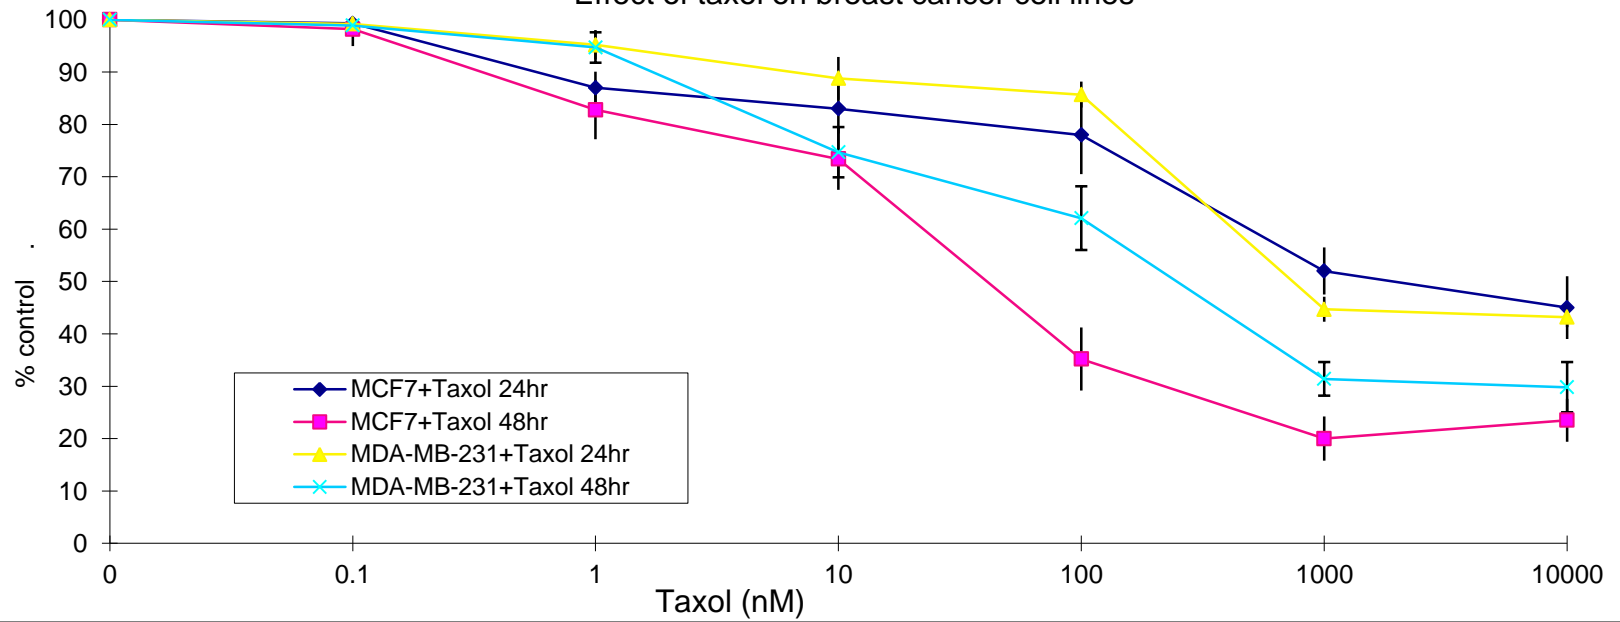

Supplement: MOESM1 [file 9540436]
